# Supplementary material for: Genome-Wide Association Study in Rice Revealed a Novel Gene in Determining Plant Height and Stem Development, by Encoding a WRKY Transcription Factor
Source: Int J Mol Sci. 2021 Jul 30;22(15):8192. doi: 10.3390/ijms22158192 (PMC8347446; doi:10.3390/ijms22158192)
Supplement: Supplementary file 1 [file ijms-22-08192-s001.zip]

Archive with 5 entries (5 files):
- Supplementary figure.pdf
- Table S1.xls
- Table S2.xlsx
- Table S3.xls
- Table S4.xlsx
