# Supplementary material for: Genome-Wide Association Study in Rice Revealed a Novel Gene in Determining Plant Height and Stem Development, by Encoding a WRKY Transcription Factor
Source: Int J Mol Sci. 2021 Jul 30;22(15):8192. doi: 10.3390/ijms22158192 (PMC8347446; doi:10.3390/ijms22158192)
Supplement: Supplementary file 1 [file ijms-22-08192-s001.zip › Table S1.xls]

## Sheet: Sheet1
Table S1. Details of the OsWRKY group III TFs
TIGR Loci	Protein length (aa)	Localization	Theoretical pI	Molecular weight (kDa)	TMHMM
LOC_Os01g46800.1	274	nuleus	7.02	29056.4	0
LOC_Os01g60490.1	265	nuleus	6.63	29807.4	0
LOC_Os01g60520.1	283	nuleus	5.86	31036.9	0
LOC_Os01g60540.1	375	Endoplasmic reticulum	5.85	40398.2	0
LOC_Os01g60640.1 (OsWRKY21)	280	nuleus	5.58	29553	0
LOC_Os03g20550.1	210	nuleus	8.38	23642.2	0
LOC_Os03g21710.1	356	nuleus	5.15	36383.7	0
LOC_Os05g14370.1	308	nuleus	6.56	34549.6	0
LOC_Os05g25770.1	326	nuleus	5.53	33987.8	0
LOC_Os05g40060.1	331	nuleus	4.61	34901.2	0
LOC_Os05g40070.1	280	nuleus	6.13	31320.6	0
LOC_Os05g40080.1	328	nuleus	4.88	34719.6	0
LOC_Os05g49620.1	277	nuleus	5.53	29872.4	0
LOC_Os06g06360.1	391	nuleus	5.79	41403.5	0
LOC_Os07g27670.1	260	nuleus	4.78	28436.6	0
LOC_Os07g48260.1	333	nuleus	6.14	34837.5	0
LOC_Os09g09630.1	291	nuleus	5.83	33175.2	0
LOC_Os09g16510.1	361	nuleus	5.96	37944.1	0
LOC_Os11g02470.1	335	nuleus	5.46	37202.4	0
LOC_Os11g02480.1	224	nuleus	8.54	25187.7	0
LOC_Os11g02520.1	280	nuleus	5.82	31661.6	0
LOC_Os11g02530.1	320	nuleus	5.95	35915.9	0
LOC_Os11g02540.1	329	nuleus	6.07	35577.7	0
LOC_Os12g02400.1	337	nuleus	5.5	37541.6	0
LOC_Os12g02420.1	224	nuleus	8.73	25261	0
LOC_Os12g02440.4	264	Chloroplast	8.38	29636.1	0
LOC_Os12g02450.1	321	nuleus	5.92	35749.5	0
LOC_Os12g02470.1	341	nuleus	5.98	36488.6	0
