# Supplementary material for: Genome-Wide Association Study in Rice Revealed a Novel Gene in Determining Plant Height and Stem Development, by Encoding a WRKY Transcription Factor
Source: Int J Mol Sci. 2021 Jul 30;22(15):8192. doi: 10.3390/ijms22158192 (PMC8347446; doi:10.3390/ijms22158192)
Supplement: Supplementary file 1 [file ijms-22-08192-s001.zip › Table S2.xlsx]

## Sheet: sheet1
Table S2:numbers of known hormone 、 stress and plant tissue specific-related cis-elements in the promoter regions of OsWRKY groupIII genes
Locoucs	MeJA-responsiveness		ABA response	anaerobic stress	auxin response		ethylene-response	gibberellinresponse		SA response		drought and sress	low-temperaturestress		drought-stress	defense and stress responsiveness	flavonoid biosynthetic genes regulation	cell cycle	zein metabolism regulation	seed-specific regulation	meristem expression	meristem activation
	CGTCA-motif	TGACG-motif	ABRE	ARE	AuxRR-core	TGA-element	ERE	GARE-motif	P-box	TCA-element	CCAAT-box	DRE1	LTR	MYC	MBS	TC-rich repeats	MBSI	MSA-like	O2-site	RY-element	CAT-box	CCGTCC-box
LOC_Os01g46800.1	3	3	9	1	1					1	2				1	1			2		1	2
LOC_Os01g60490.1			4	1			2					1	1	3					1		1
LOC_Os01g60520.1	3	3	2	2		1					1		2	1							2
LOC_Os01g60540.1	2	2	2	2			1				1		2	3	2				1			2
LOC_Os01g60640.1(OsWRKY21)	3	3	8				2	1			1			3	1						1
LOC_Os03g20550.1			6	3	1		1			1		1		2	3						4
LOC_Os03g21710.1	2	2	6	2				1	1			1	1	5				1	1			2
LOC_Os05g14370.1	4	4	1	3			4			1				6	1						1	1
LOC_Os05g25770.1	6	6	2	2			2						1	4	2						1	1
LOC_Os05g40060.1	2	2		1							1			3					2		1
LOC_Os05g40070.1	1	1	1	2			2			1			1	4		1						2
LOC_Os05g40080.1	1	1	1											2	3	2			2
LOC_Os05g49620.1	2	2	4	3								1		5	1			1			2
LOC_Os06g06360.1	1	1		1				1			1		1		1					1
LOC_Os07g27670.1	1	1								1		1		8	1						3
LOC_Os07g48260.1	2	2	4						1					4	5	1					1	1
LOC_Os09g09630.1	3	3		2			1	1						4	1				2		2	1
LOC_Os09g16510.1	1	1	2	3					1	2		1	1	2	2	1					1
LOC_Os11g02470.1	2	2	4	5			1				1			5	2				1
LOC_Os11g02480.1	1	1	3							2	1		1	2			1		1
LOC_Os11g02520.1	2	2	1	2		1	1	1		2			1	4	2				1
LOC_Os11g02530.1	4	4	1	1										3	1
LOC_Os11g02540.1	2	2	2	1					1	3				4	1	1		1			3	1
LOC_Os12g02400.1	3	3	3	3			1		1		1			8	2				1			1
LOC_Os12g02420.1	1	1					1	1		1				5		1					1	1
LOC_Os12g02440.4	5	5	4		1				1	2			1	4	1				2			1
LOC_Os12g02450.1	5	5					1							3	2	1			1
LOC_Os12g02470.1	5	5	3	1			1			5	1		1	5	2					1		3
