# Supplementary material for: Genome-Wide Association Study in Rice Revealed a Novel Gene in Determining Plant Height and Stem Development, by Encoding a WRKY Transcription Factor
Source: Int J Mol Sci. 2021 Jul 30;22(15):8192. doi: 10.3390/ijms22158192 (PMC8347446; doi:10.3390/ijms22158192)
Supplement: Supplementary file 1 [file ijms-22-08192-s001.zip › Table S3.xls]

## Sheet: file 1
Supplementary Table S3: Tissues and developmental stages throughout the life cycles of two rice varieties
Sample No	Abbreviation	Tissues or organ	Developmental stages
M2(Minghui)/Z2(Zhenshan)	Calli 2	Calli	5 DAR (days after regeneration)
M3(Minghui)/Z3(Zhenshan)	Calli 3	Calli	Screening stage
M6(Minghui)/Z6(Zhenshan)	Seed imbibition	Seed	72 h after imbibition
M7(Minghui)/Z7(Zhenshan)	Seed germination	Embryo bud and radicle	3 days after germination
M8(Minghui)/Z8(Zhenshan)	Plumule/Dark	Plumule	48 hours after emergence, Dark
M9(Minghui)/Z9(Zhenshan)	Plumule/Light	Plumule	48 hours after emergence, Light
M10(Minghui)/Z10(Zhenshan)	Radicle/Dark	Radicle	48 hours after emergence, Dark
M11(Minghui)/Z11(Zhenshan)	Radicle/Light	Radicle	48 hours after emergence, Light
M12(Minghui)/Z12(Zhenshan)	Seedlings	Seedling	Three-leaf stage
M13(Minghui)/Z13(Zhenshan)	Young shoot	Shoot	Seedlings with 2 tillers
M14(Minghui)/Z14(Zhenshan)	Young root	Root	Seedlings with 2 tillers
M15(Minghui)/Z15(Zhenshan)	Mature leaf	Leaf	Stage 3(secondary branch primordium differentiation stage)
M16(Minghui)/Z16(Zhenshan)	Old leaf	Leaf	4–5 cm young panicle
M17(Minghui)/Z17(Zhenshan)	Mature sheath	Sheath	Stage 3
M18(Minghui)/Z18(Zhenshan)	Old sheath	Sheath	4–5 cm young panicle
M19(Minghui)/Z19(Zhenshan)	Young flag leaf	Flag leaf	5 DBH (5 days before heading)
M20(Minghui)/Z20(Zhenshan)	Old flag leaf	Flag leaf	14 DAH (14 days after heading)
M21(Minghui)/Z21(Zhenshan)	Panicle, stage 3	Young Panicle	Stage 3
M22(Minghui)/Z22(Zhenshan)	Panicle, stage 4	Young Panicle	Stage 4 (pistil/stamen primordium differentiation stage)
M23(Minghui)/Z23(Zhenshan)	Panicle, stage 5	Young Panicle	Stage 5 (pollen-mother cell formation stage)
M24(Minghui)/Z24(Zhenshan)	Young panicle	Panicle	4–5 cm young panicle
M25(Minghui)/Z25(Zhenshan)	Old panicle	Panicle	Heading stage
M26(Minghui)/Z26(Zhenshan)	Young stem	Stem	5 DBH
M27(Minghui)/Z27(Zhenshan)	Old stem	Stem	Heading stage
M28(Minghui)/Z28(Zhenshan)	Hull	Hull	1 DBF (1 day before flowering)
M29(Minghui)/Z29(Zhenshan)	Spikelet	Spikelet	3 DAP (3 days after pollination)
M31(Minghui)/Z31(Zhenshan)	Endosperm 1	Endosperm	7 DAP (7 days after pollination)
M32(Minghui)/Z32(Zhenshan)	Endosperm 2	Endosperm	14 DAP (14 days after pollination)
M33(Minghui)/Z33(Zhenshan)	Endosperm 3	Endosperm	21 DAP (21 days after pollination)
		Plumule	48 hours after emergence, light
