# Supplementary material for: Genome-Wide Association Study in Rice Revealed a Novel Gene in Determining Plant Height and Stem Development, by Encoding a WRKY Transcription Factor
Source: Int J Mol Sci. 2021 Jul 30;22(15):8192. doi: 10.3390/ijms22158192 (PMC8347446; doi:10.3390/ijms22158192)
Supplement: Supplementary file 1 [file ijms-22-08192-s001.zip › Table S4.xlsx]

## Sheet: Sheet2
Supplementary Table S4 Primers list of OsWRKY21 genes for quantitative real-time RT-PCR analysis
Gene Name	phytozome accession number	primers	Sequence (5'-3')
OsWRKY21	LOC_Os01g60640	Forward	CTTGAATGGCAGCTTCGACTG
		Reverse	GACTACTGCACTCTTGGGGC
OsUbiquitin	LOC_Os09g27930	Forward	AACCAGCTGAGGCCCAAGA
		Reverse	ACGATTGATTTAACCAGTCCATGA
gWRKY21-1	LOC_Os01g60640	Forward	ACGGTCTCAGGGAGGAGCCACGTTTTAGAGCTAGAA
		Reverse	ACGGTCTCATCCCCGGTTCAGTGCACCAGCCGGGAA
gWRKY21-2	LOC_Os01g60640	Forward	TAGGTCTCACTGCGCGTTCAG GTTTTAGAGCTAGAA
		Reverse	ATGGTCTCG GCAGCGGTAGTATGCACCAGCCGGGAA
